# Supplementary material for: Co-existence of IL7R high and SH2B3 low expression distinguishes a novel high-risk acute lymphoblastic leukemia with Ikaros dysfunction
Source: PubMed Central journal article supplement (PMC5216778; doi:10.18632/oncotarget.10014), 2016-06-14
Supplement: oncotarget-07-46014-s001.pdf [file oncotarget-07-46014-s001.pdf]

# Co-existence of IL7R high and SH2B3 low expression distinguishes a novel high-risk acute lymphoblastic leukemia with Ikaros dysfunction

## SUPPLEMENTARY FIGURES AND TABLE

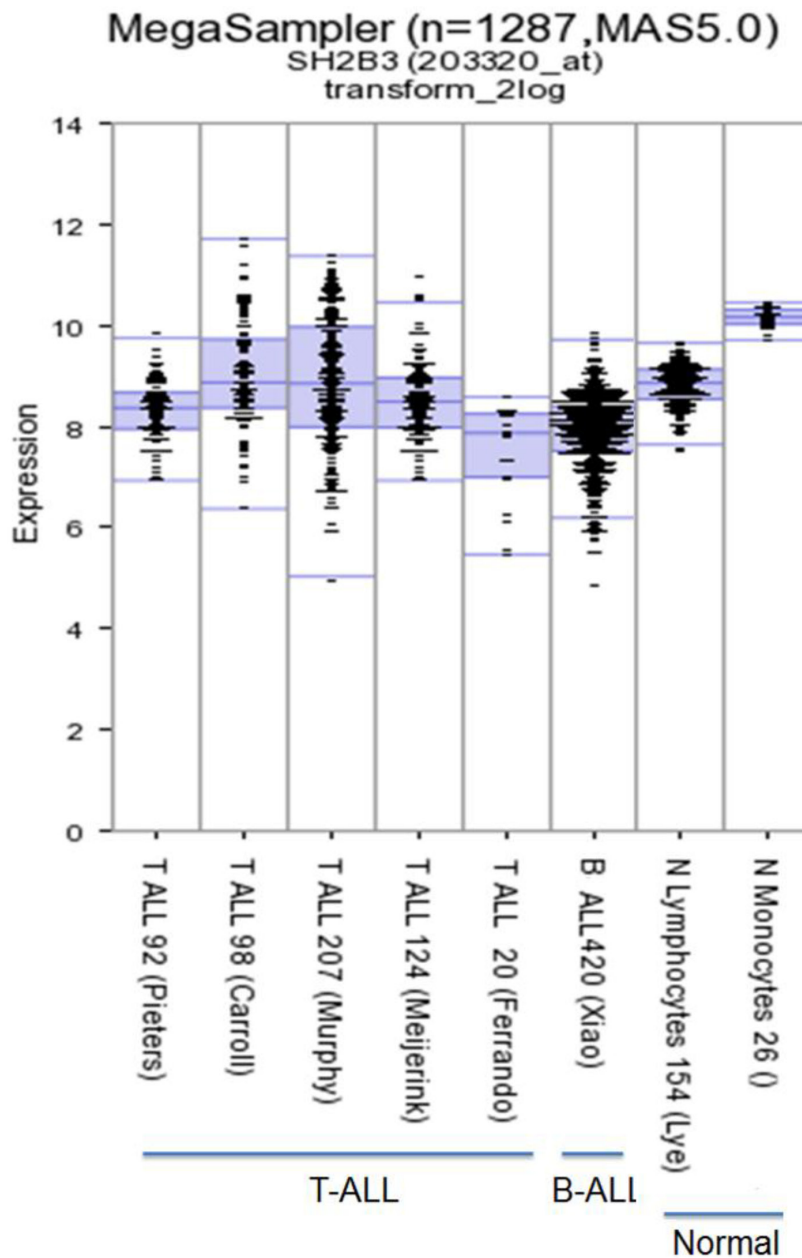

Supplementary Figure S1: SH2B3 expression in the reported ALL microarray cohort studies.

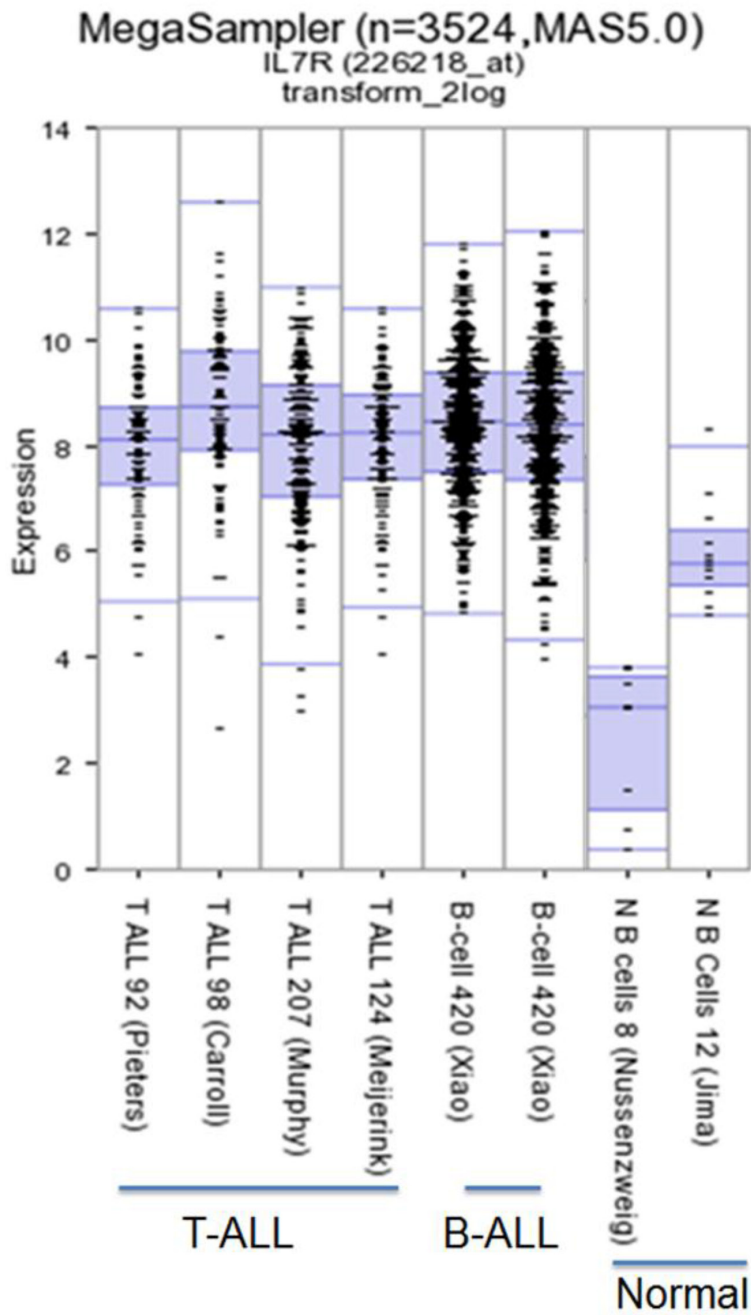

Supplementary Figure S2: IL7R expression in reported ALL microarray cohort studies.

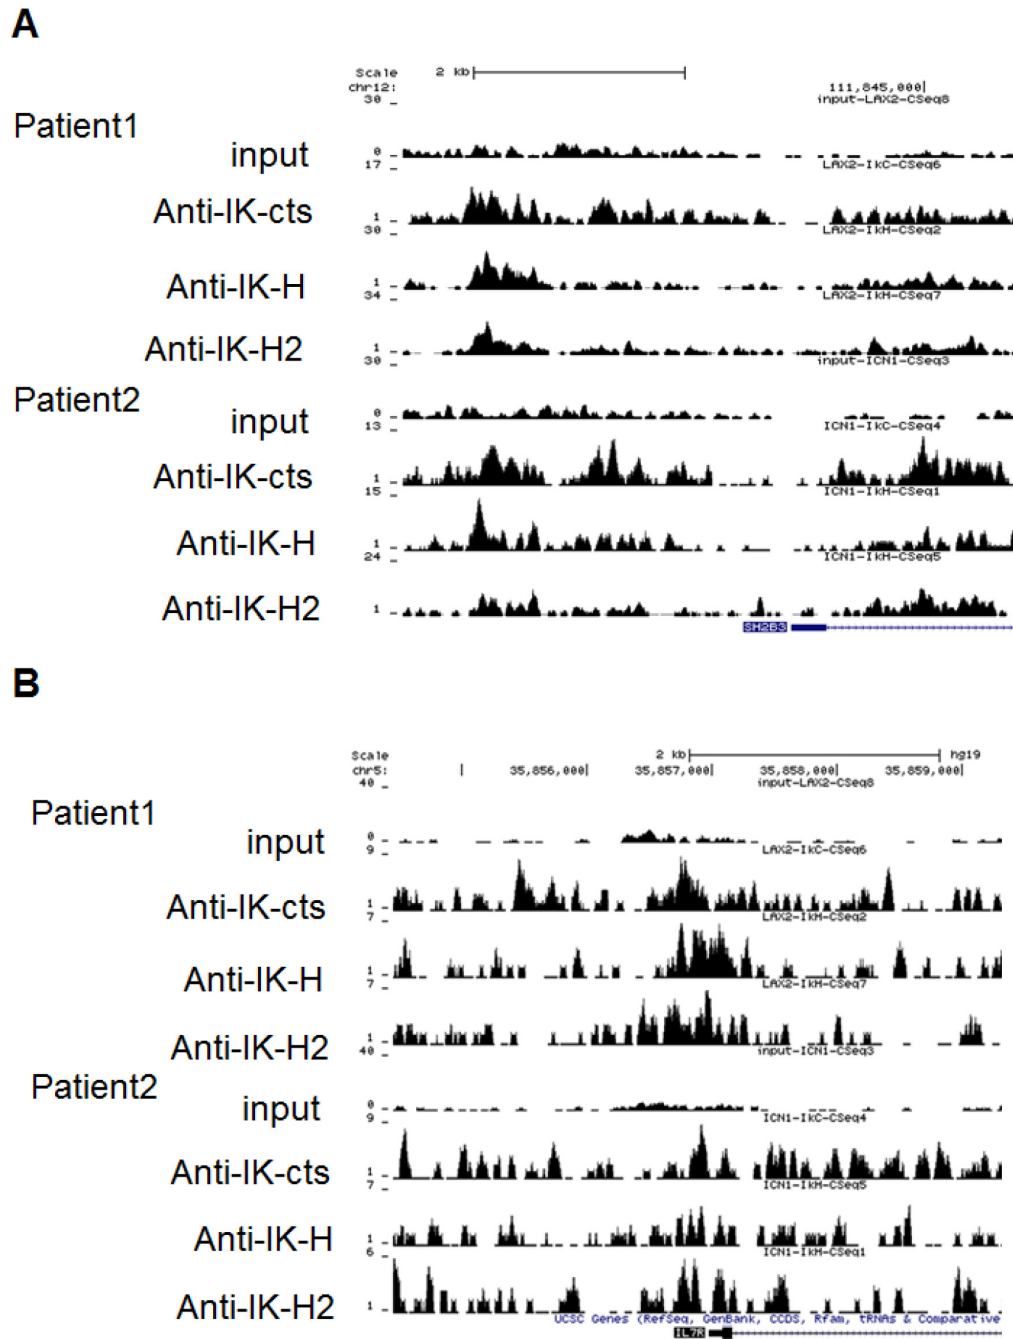

Supplementary Figure S3: Ikaros binds to the promoter of SH2B3 (A) and IL7R (B) in primary B-ALL identified by ChIP-seq.

Supplementary Table S1: Correlation of IL7R<sup>high</sup>SH2B3<sup>low</sup> expression with clinical features in adult B-ALL

| Characteristics                     | IL7R <sup>high</sup> SH2B3 <sup>low</sup><br>(N=28) | IL7R <sup>low</sup> SH2B3 <sup>high</sup><br>(N=18) | P value |
|-------------------------------------|-----------------------------------------------------|-----------------------------------------------------|---------|
| Age (years)                         |                                                     |                                                     |         |
| median (range)                      | 44.0(14.0-68.0)                                     | 31.0(14.0-77.0)                                     | 0.356   |
| ≥35(years)                          | 78.6                                                | 44.4                                                | 0.018   |
| Sex (%)                             |                                                     |                                                     |         |
| male                                | 42.9                                                | 72.2                                                | 0.051   |
| WBC, ×10 <sup>9</sup> /L            |                                                     |                                                     |         |
| median (range)                      | 60.7(6.7-488.0)                                     | 12.9(3.5-106.9)                                     | 0.001   |
| ≥30×10 <sup>9</sup> /L              | 71.4                                                | 16.7                                                | 0.000   |
| HGB,g/L                             |                                                     |                                                     |         |
| median (range)                      | 90.5(51.0-150.0)                                    | 82.0(44.0-138.0)                                    | 0.348   |
| PLT,×10 <sup>9</sup> /L             |                                                     |                                                     |         |
| median (range)                      | 47.0(9.0-269.0)                                     | 17.0(4.0-292.0)                                     | 0.076   |
| LDH (u/L)                           |                                                     |                                                     |         |
| median (range)                      | 702.0(272.0-4129.0)                                 | 714.0(175.0-7142.0)                                 | 0.917   |
| Blasts (%)median (range)            |                                                     |                                                     |         |
| bone marrow                         | 89.6(47.2-98.8)                                     | 89.6(75.0-97.2)                                     | 0.914   |
| peripheral blood                    | 81.0(0.0-100.0)                                     | 45.0(0.0-100.0)                                     | 0.035   |
| Immune phenotype,%                  |                                                     |                                                     |         |
| CD13+                               | 45.8                                                | 41.7                                                | 1.000   |
| CD33+                               | 45.8                                                | 45.5                                                | 1.000   |
| Extramedullary infiltration (%)     |                                                     |                                                     |         |
| liver                               | 17.9                                                | 11.1                                                | 0.841   |
| spleen                              | 60.7                                                | 11.1                                                | 0.001   |
| lymph node                          | 53.6                                                | 22.2                                                | 0.035   |
| Genetics (%)                        |                                                     |                                                     |         |
| IKZF1 deletion (IK6)                | 60.7                                                | 6.3                                                 | 0.000   |
| BCR/ABL1 fusion gene(Ph+)           | 75.0                                                | 16.7                                                | 0.000   |
| complex karyotype                   | 13.6                                                | 25.0                                                | 0.589   |
| Duration to achieve CR(≥30 days, %) | 32.1                                                | 16.7                                                | 0.451   |
| Relapse rate (in 1year, %)          | 71.4                                                | 27.8                                                | 0.004   |
